# Supplementary material for: Individual and organisational factors in the psychosocial work environment are associated with home care staffs’ job strain: a Swedish cross-sectional study
Source: Springer Nature journal article supplement (doi:10.1186/s12913-022-08699-4), 2022-11-26
Supplement: MOESM1 [file 23758928]

**Supplement 1.** Layout of the SDCS questionnaire.

This is an example of the design of the SDCS questionnaire showing the *item* regarding situations, thoughts, and feelings on the left. The response regarding the *frequency* of these situation, thoughts, and feelings is in the middle, and the response regarding how much *stress* these situations create is on the far right in the questionnaire.

To the left in the picture below, is the original Swedish version used for this study, and to the right a translated English section to illustrate the layout.

Missing data was mostly connected to the question about the level of stress on the right-hand side of the questionnaire.

| Situationer, tankar och känslor                                                                                                                                          | Hur ofta upplever du dessa situationer, tankar eller känslor? |                          |                          |                          | När detta sker, hur mycket stress orsakar det dig? |                          |                          |                          |
|--------------------------------------------------------------------------------------------------------------------------------------------------------------------------|---------------------------------------------------------------|--------------------------|--------------------------|--------------------------|----------------------------------------------------|--------------------------|--------------------------|--------------------------|
|                                                                                                                                                                          | Aldrig                                                        | Ibland                   | Ganska ofta              | Mycket ofta              | Ingen stress                                       | Liten stress             | Måttlig stress           | Hög stress               |
| 11. Jag tycker att det är svårt att förklara för vårdtagare vad det är som händer i situationer som kan göra dem upprörda (t.ex. vid duschning, bad eller toalettbesök). | <input type="checkbox"/>                                      | <input type="checkbox"/> | <input type="checkbox"/> | <input type="checkbox"/> | <input type="checkbox"/>                           | <input type="checkbox"/> | <input type="checkbox"/> | <input type="checkbox"/> |
| 12. Jag måste väga vårdtagarnas behov mot deras familjers behov eller krav.                                                                                              | <input type="checkbox"/>                                      | <input type="checkbox"/> | <input type="checkbox"/> | <input type="checkbox"/> | <input type="checkbox"/>                           | <input type="checkbox"/> | <input type="checkbox"/> | <input type="checkbox"/> |
| 13. Jag måste väga vårdtagares behov mot andra vårdtagares behov eller krav.                                                                                             | <input type="checkbox"/>                                      | <input type="checkbox"/> | <input type="checkbox"/> | <input type="checkbox"/> | <input type="checkbox"/>                           | <input type="checkbox"/> | <input type="checkbox"/> | <input type="checkbox"/> |
| 14. Jag måste prioritera utifrån grad av angelägenhet snarare än utifrån rättvisa och vårdtagarnas behov.                                                                | <input type="checkbox"/>                                      | <input type="checkbox"/> | <input type="checkbox"/> | <input type="checkbox"/> | <input type="checkbox"/>                           | <input type="checkbox"/> | <input type="checkbox"/> | <input type="checkbox"/> |
| 15. Jag upplever att vårdtagarna i hög grad är beroende av mig.                                                                                                          | <input type="checkbox"/>                                      | <input type="checkbox"/> | <input type="checkbox"/> | <input type="checkbox"/> | <input type="checkbox"/>                           | <input type="checkbox"/> | <input type="checkbox"/> | <input type="checkbox"/> |
| 16. Jag önskar att jag visste mer om vårdtagarna så att jag kunde förstå dem bättre.                                                                                     | <input type="checkbox"/>                                      | <input type="checkbox"/> | <input type="checkbox"/> | <input type="checkbox"/> | <input type="checkbox"/>                           | <input type="checkbox"/> | <input type="checkbox"/> | <input type="checkbox"/> |
| 17. Jag kan inte sluta att tänka på vårdtagarna när jag är ledig från arbetet.                                                                                           | <input type="checkbox"/>                                      | <input type="checkbox"/> | <input type="checkbox"/> | <input type="checkbox"/> | <input type="checkbox"/>                           | <input type="checkbox"/> | <input type="checkbox"/> | <input type="checkbox"/> |
| 18. Jag ser annan personal bete sig mot vårdtagare på ett sätt som visar att de inte förstår effekterna av demenssjukdomen.                                              | <input type="checkbox"/>                                      | <input type="checkbox"/> | <input type="checkbox"/> | <input type="checkbox"/> | <input type="checkbox"/>                           | <input type="checkbox"/> | <input type="checkbox"/> | <input type="checkbox"/> |
| 19. Familjer till vårdtagare verkar inte förstå hur svårt det är att vårda deras släkting.                                                                               | <input type="checkbox"/>                                      | <input type="checkbox"/> | <input type="checkbox"/> | <input type="checkbox"/> | <input type="checkbox"/>                           | <input type="checkbox"/> | <input type="checkbox"/> | <input type="checkbox"/> |
| 20. Vårdtagare motsätter sig den vård jag vill/behöver ge.                                                                                                               | <input type="checkbox"/>                                      | <input type="checkbox"/> | <input type="checkbox"/> | <input type="checkbox"/> | <input type="checkbox"/>                           | <input type="checkbox"/> | <input type="checkbox"/> | <input type="checkbox"/> |

  

| Situation, thoughts and feelings                                                                                                                  | How often do you experience these situation, thoughts, and feelings? |                          |                          |                          | When this occurs, how much stress does it cause you? |                          |                          |                          |
|---------------------------------------------------------------------------------------------------------------------------------------------------|----------------------------------------------------------------------|--------------------------|--------------------------|--------------------------|------------------------------------------------------|--------------------------|--------------------------|--------------------------|
|                                                                                                                                                   | Never                                                                | Sometimes                | Rather often             | Very often               | No stress                                            | Little stress            | Moderate stress          | High stress              |
| 11. I find it difficult to explain to older persons what is happening in situations which may upset them (e.g., showering, bathing, or toileting) | <input type="checkbox"/>                                             | <input type="checkbox"/> | <input type="checkbox"/> | <input type="checkbox"/> | <input type="checkbox"/>                             | <input type="checkbox"/> | <input type="checkbox"/> | <input type="checkbox"/> |
| 12. I must balance the needs of the older person against the needs of his or her family                                                           | <input type="checkbox"/>                                             | <input type="checkbox"/> | <input type="checkbox"/> | <input type="checkbox"/> | <input type="checkbox"/>                             | <input type="checkbox"/> | <input type="checkbox"/> | <input type="checkbox"/> |
